# Supplementary material for: Facile and large-scale synthesis of Gd(OH)3 nanorods for MR imaging with low toxicity
Source: Royal Society of Chemistry journal article supplement (doi:10.1039/c2nj21009f), 2012-01-01
Supplement: c2nj21009f.pdf [file c2nj21009f.pdf]

**Supporting information for:**

**Facile and Large-Scale Synthesis of Monodisperse Gd(OH)<sub>3</sub> Nanorods**

**5 for in Vivo MR Imaging with Low Toxicity**

**Sa Huang, Jianhua Liu, Di Liu, Qinghai Yuan\***

10 Department of Radiology, The Second Hospital of Jilin University Norman Bethune, Changchun 130041, PR  
China

Corresponding author:

Tel.: +86 431 88796996

Fax: +86 431 88915858

15 E-mail address: [yuanqinghai123@sina.com](mailto:yuanqinghai123@sina.com)

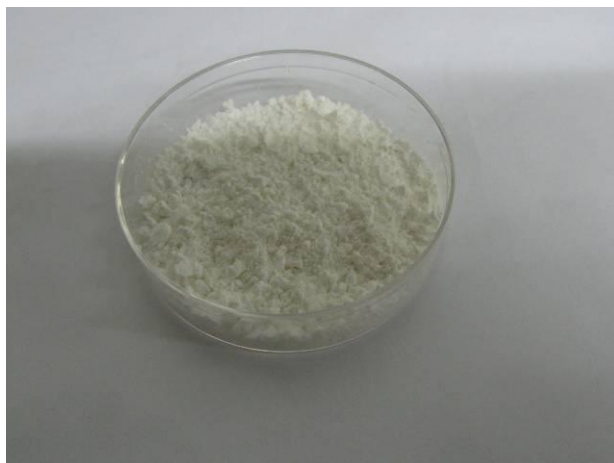

**Figure S1.** Photo of powder of  $\text{Gd}(\text{OH})_3$  nanorods. The sample was totally dried and placed in one 4cm dish. The nanorods 5 were synthesized in two Teflon-lined stainless-steel autoclaves (50 mL).

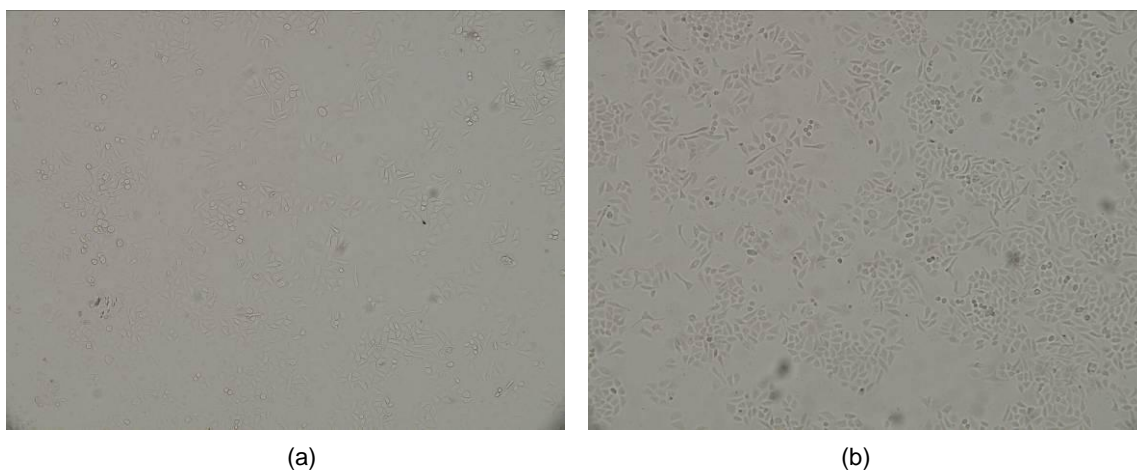

**5 Figure S2.** Microscopic images of HepG2 cells incubated without (a) and with (b) the nanorods for 48 h.

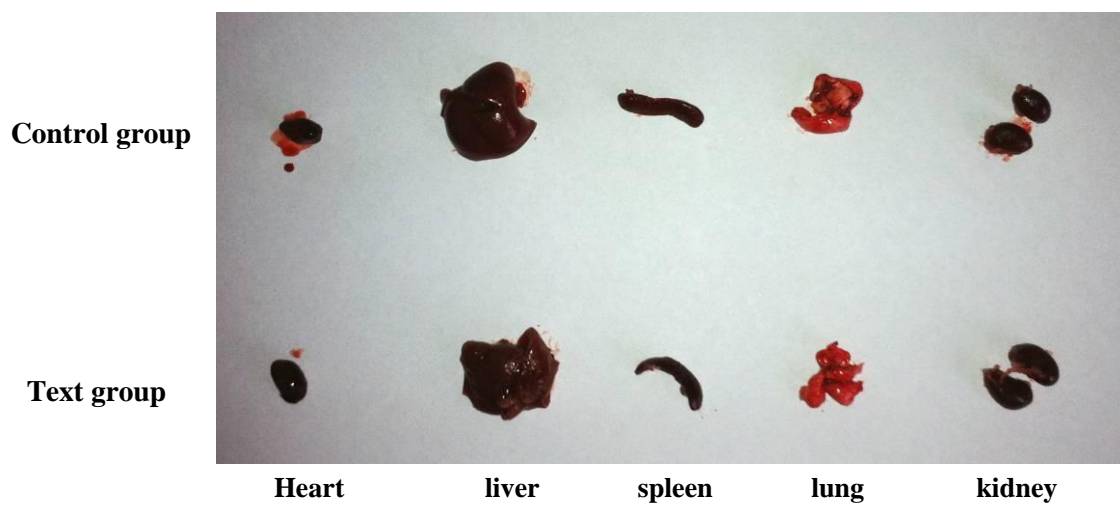

**5 Figure S3.** Organ changes of the mouse after intravenous injection of a single dose of  $Gd(OH)_3$  nanorods solution. These organs were harvested from heart, spleen, liver, lung, as well as kidney.
